# Supplementary material for: Promotive Role of 5-Aminolevulinic Acid or Salicylic Acid Combined with Citric Acid on Sunflower Growth by Regulating Manganese Absorption
Source: MDPI journal article supplement (doi:10.3390/antiox12030580), 2023-02-25
Supplement: s1 [file s1]

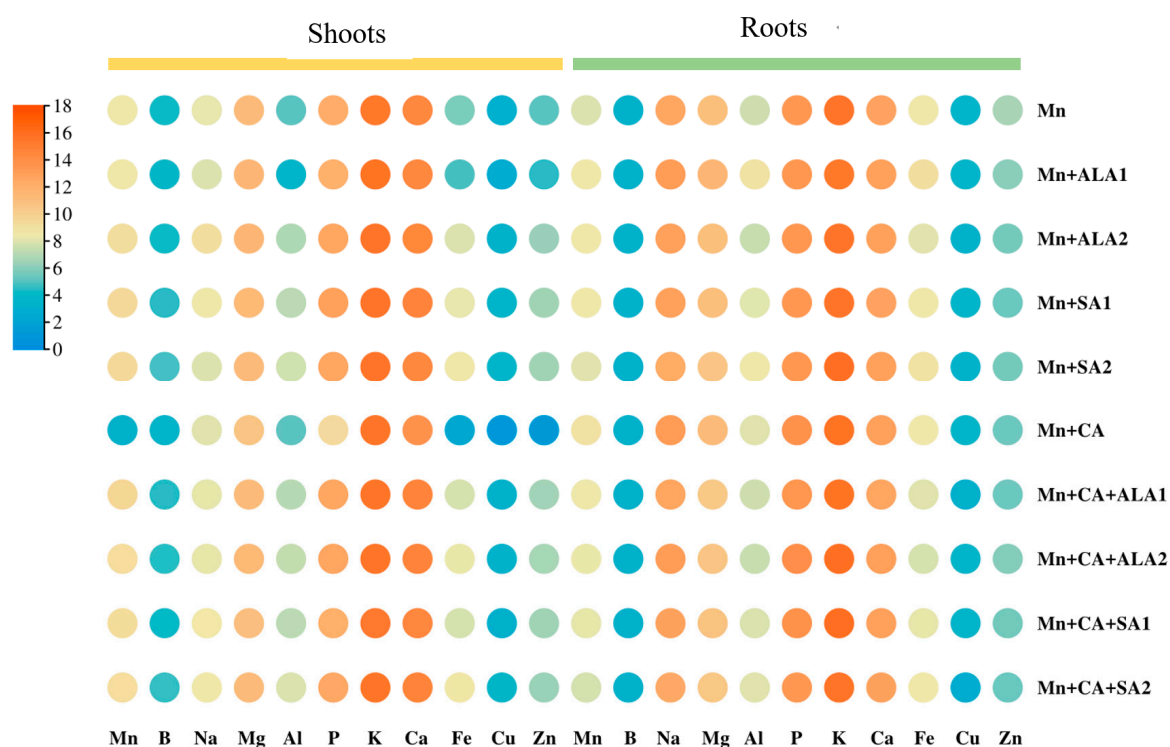

Figure S1. The heatmap of effects of 5-aminolevulinic acid or salicylic acid (ALA/SA) combined with citric acid (CA) on manganese (Mn) and other elements concentration on shoots and roots of Mn treated sunflower plants. Mn means that plants exposed to  $0.8 \text{ g kg}^{-1}$  of Mn for 7 days; Mn + ALA1/ALA2 indicates spraying with  $10/20 \text{ mg L}^{-1}$  ALA after Mn treatment for 7 days; Mn + SA1/SA2 indicates spraying with  $50/100 \text{ mg L}^{-1}$  SA after Mn treatment for 7 days. Mn + CA indicates plants treated with  $20 \text{ mmol kg}^{-1}$  CA 7 days after Mn treatment. Mn + CA + ALA/SA treatment indicates plants treated with ALA/SA for one week after CA treatment. Data are the means of three replicates by Log<sub>2</sub> fold change.

(a)

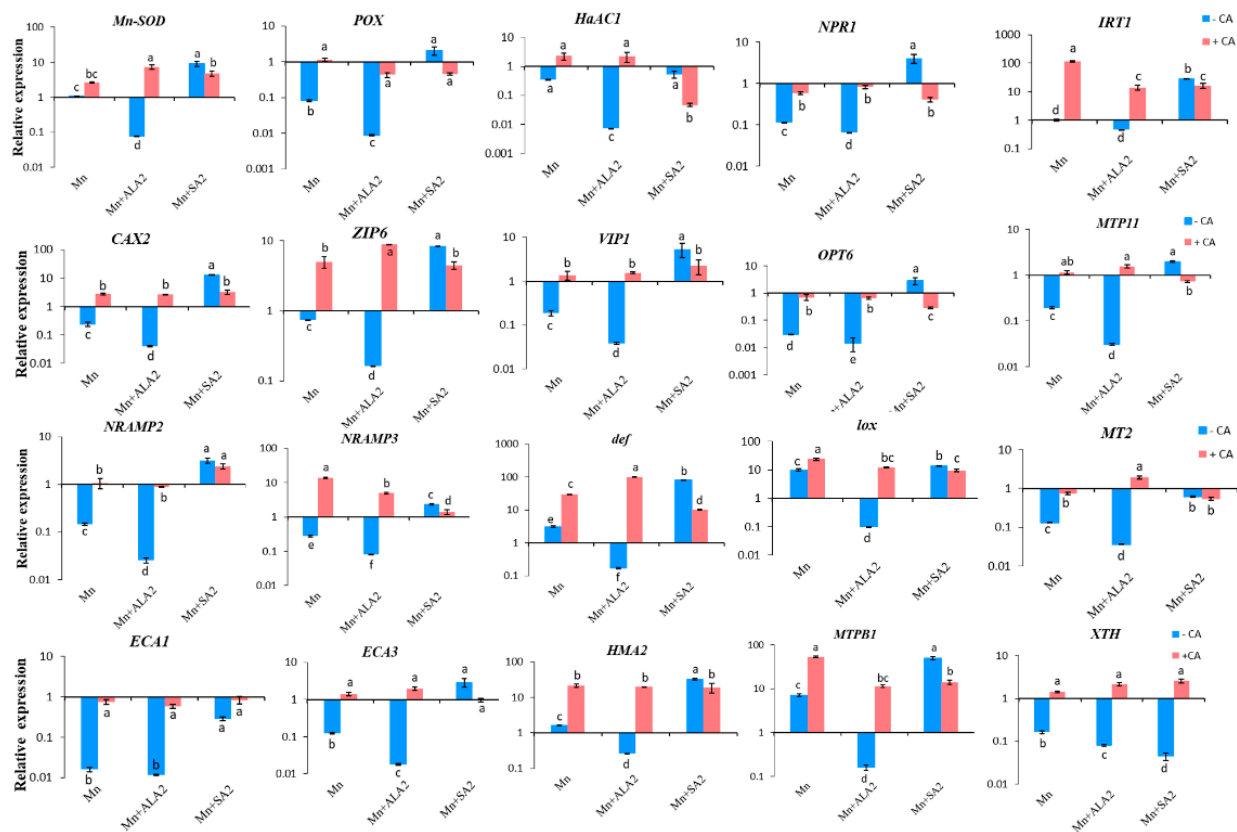

(b)

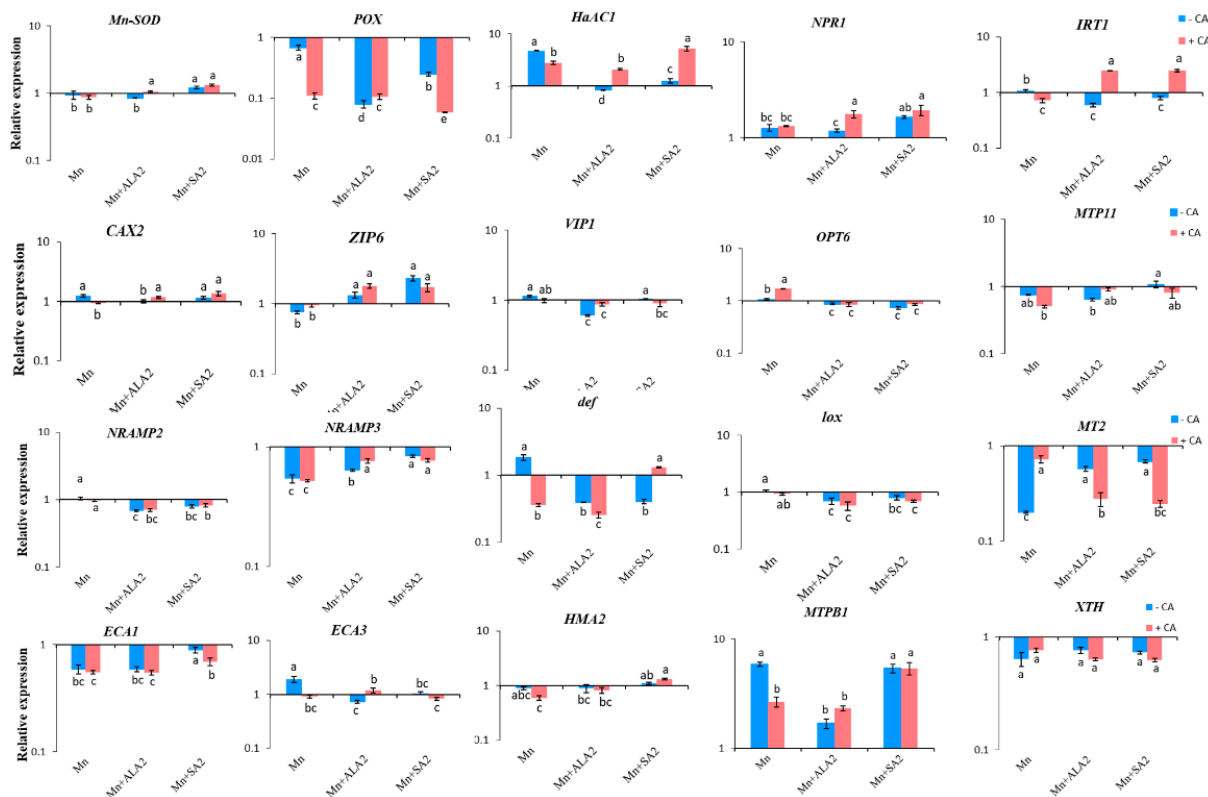

**Figure S2.** Effects of 5-aminolevulinic acid or salicylic acid (ALA/SA) combined with citric acid (CA) on tolerant-related gene expression patterns in the leaves (a) and roots (b) of manganese (Mn)-treated sunflower plants. CA, 20 mmol kg<sup>-1</sup> citric acid treatment. CK, control plants without any treatment; Mn, plants exposed to 0.8 g kg<sup>-1</sup> of Mn for 7 days; Mn + CA, plants

treated with CA 7 days after Mn treatment; Mn + CA + ALA2, plants treated with 20 mg L<sup>-1</sup> ALA for one week after CA treatment; Mn + CA + SA2, plants treated with 100 mg L<sup>-1</sup> SA for one week after CA treatment. The relative expression levels are calculated by  $2^{-\Delta\Delta C_t}$  method compared with that of *EF-1 $\alpha$*  with three replicates. The results are represented by means  $\pm$  standard errors. The expression level in control is normalized as "1". Means are denoted by the same letter when there is no significant difference at  $P < 0.05$  as determined by Duncan's multiple range test.

**Table S1** The combinations of different treatments in the experiment.

| Agentia<br>Treatments | CK | Mn<br>(800 mg kg <sup>-1</sup> ) | CA<br>(20 mmol kg <sup>-1</sup> ) | ALA1<br>(10 mg L <sup>-1</sup> ) | ALA2<br>(20 mg L <sup>-1</sup> ) | SA1<br>(50 mg L <sup>-1</sup> ) | SA2<br>(100 mg L <sup>-1</sup> ) |
|-----------------------|----|----------------------------------|-----------------------------------|----------------------------------|----------------------------------|---------------------------------|----------------------------------|
| 1                     | √  |                                  |                                   |                                  |                                  |                                 |                                  |
| 2                     |    |                                  |                                   | √                                |                                  |                                 |                                  |
| 3                     |    |                                  |                                   |                                  | √                                |                                 |                                  |
| 4                     |    |                                  |                                   |                                  |                                  | √                               |                                  |
| 5                     |    |                                  |                                   |                                  |                                  |                                 | √                                |
| 6                     |    | √                                |                                   |                                  |                                  |                                 |                                  |
| 7                     |    | √                                |                                   | √                                |                                  |                                 |                                  |
| 8                     |    | √                                |                                   |                                  | √                                |                                 |                                  |
| 9                     |    | √                                |                                   |                                  |                                  | √                               |                                  |
| 10                    |    | √                                |                                   |                                  |                                  |                                 | √                                |
| 11                    |    | √                                | √                                 |                                  |                                  |                                 |                                  |
| 12                    |    | √                                | √                                 | √                                |                                  |                                 |                                  |
| 13                    |    | √                                | √                                 |                                  | √                                |                                 |                                  |
| 14                    |    | √                                | √                                 |                                  |                                  | √                               |                                  |
| 15                    |    | √                                | √                                 |                                  |                                  |                                 | √                                |

**Table S2** Primers of sunflower genes used for the RT-qPCR analysis

| Gene          | Description                                               | PCR primers                                    | Accession No. |
|---------------|-----------------------------------------------------------|------------------------------------------------|---------------|
| <i>EF-1α</i>  | elongation factor 1 alpha (reference gene)                | GGATACAACCCCGACAAA<br>CCTGAAGTGGGAGACGGA       | LOC110904321  |
| <i>Mn-SOD</i> | superoxide dismutase [Mn], mitochondrial                  | TGAATGCTGAAGGTGCTG<br>CCCAAACATCTATGCCAAT      | LOC110872653  |
| <i>POX</i>    | basic peroxidase                                          | CAGCTCGTGATGCTTCTGTC<br>GCGACCATTCTCTCGTGTT    | LOC110921228  |
| <i>HaAC1</i>  | auxin-induced protein PCNT115                             | AGTGTCCATCCAATAACTGCCA<br>ACCTTGAAAGTTCGGACGAT | LOC110908643  |
| <i>NPR1</i>   | BTB/POZ domain and ankyrin repeat-containing protein NPR1 | TGGGTATGATGCGTTTCTCGT<br>AGTTGAGAAGACGACGCTGA  | LOC110898811  |
| <i>CAX2</i>   | vacuolar cation/proton exchanger 3                        | CCCACTTCAACCCACCAATC<br>GGTGGGCAGATCATACTGGA   | LOC110935436  |
| <i>IRT1</i>   | probable zinc transporter 10                              | ACTCATGGTGGACTCGATGG<br>TGGCTACGACACGATAACGA   | LOC110872294  |
| <i>OPT6</i>   | oligopeptide transporter 6                                | AAGACGAAAGGTGCATTTCGG<br>TAGCAACACCACAAGCCAAC  | LOC110936446  |
| <i>NRAMP2</i> | metal transporter Nramp2                                  | CTGATGTGGGCGACGGTAAT<br>AGCAATCGCACTCCCAATCA   | LOC110915178  |
| <i>NRAMP3</i> | metal transporter Nramp1-like                             | CGAGTACGGAACCAATACGC<br>GCTGAACAAGCAAGCCGATA   | LOC110903996  |
| <i>ZIP6</i>   | zinc transporter 6, chloroplastic                         | CTTCACAAGCGTCATCGGAA<br>GAGATGACACCTGGCAATCG   | LOC110869063  |
| <i>VIP1</i>   | transcription factor VIP1                                 | ACCATGCTCCAGCGGGATA<br>AACATATGCGCATGCTGAGG    | LOC110942245  |
| <i>MTPB1</i>  | metal tolerance protein B                                 | GTCTTGTGACCGTTGTTGCT<br>AAATGGGCTGCATCCGTAAG   | LOC110940073  |
| <i>MTP11</i>  | metal tolerance protein 11                                | GATGGATCCC GTTGGAGCTA<br>GCCCGTACGGTATCAATGTG  | LOC110877757  |
| <i>def</i>    | defensin (anther-specific protein SF18-like)              | TCCGGAACATGTGGCAAGAC<br>CTTCTCCTTGGCGAGCTCTT   | LOC110893837  |
| <i>lox</i>    | lipoxygenase 2, chloroplastic                             | GTGTCATCACCATCCAAC<br>GCATAAGCCTTCACTGTCT      | LOC110898679  |
| <i>ECA1</i>   | calcium-transporting ATPase 1, endoplasmic reticulum-type | GGCTGGCCAAGAACTTCAA<br>TACACCCGAGAGTCTCAACG    | LOC110908087  |
| <i>ECA3</i>   | calcium-transporting ATPase 3, endoplasmic reticulum-type | GGCTGGCCAAGAACTTCAA<br>TACACCCGAGAGTCTCAACG    | LOC110894822  |
| <i>HMA2</i>   | cadmium/zinc-transporting ATPase HMA2                     | TCAAATGGTTGGCACTCGGA<br>TCAGTGCTTCATAGCAGGCTT  | LOC110929174  |
| <i>MT2/mt</i> | metallothionein-like protein type 2                       | CTTGCTGCAGCGGAAAGT<br>GTTTCCACCCTCAGCAACAA     | LOC110873772  |
| <i>XTH</i>    | xyloglucan endotransglucosylase/hydrolase protein 9       | GTGTTGGTAACAGGGAGCAG<br>TACACCCATGGCTTGGTCTT   | LOC110911614  |

**Table S3** Pearson correlation coefficients among plant biomass (DW), POD in root, oxidative damage in root, Mn uptake, Mn translocation in sunflower under Mn treatment (n=3).

|                                         | Shoot biomass | Root biomass | POD in leaves | APX in leaves | MDA in leaves | H <sub>2</sub> O <sub>2</sub> in leaves | Shoot Mn concentrations | Root Mn concentrations | TF      | RE |
|-----------------------------------------|---------------|--------------|---------------|---------------|---------------|-----------------------------------------|-------------------------|------------------------|---------|----|
| Shoot biomass                           | 1             |              |               |               |               |                                         |                         |                        |         |    |
| Root biomass                            | 0.497**       | 1            |               |               |               |                                         |                         |                        |         |    |
| POD in leaves                           | 0.039         | 0.092        | 1             |               |               |                                         |                         |                        |         |    |
| APX in leaves                           | 0.453*        | -0.026       | -0.490**      | 1             |               |                                         |                         |                        |         |    |
| MDA in leaves                           | 0.233         | -0.277       | -0.330        | 0.410*        | 1             |                                         |                         |                        |         |    |
| H <sub>2</sub> O <sub>2</sub> in leaves | -0.549**      | -0.605**     | -0.206        | -0.164        | 0.457*        | 1                                       |                         |                        |         |    |
| Shoot Mn concentrations                 | -0.730**      | -0.383*      | 0.444*        | -0.620**      | -0.276        | 0.368*                                  | 1                       |                        |         |    |
| Root Mn concentrations                  | 0.705**       | 0.620**      | 0.084         | 0.381*        | -0.056        | -0.598**                                | -0.407*                 | 1                      |         |    |
| Translocation factor                    | -0.855**      | -0.577**     | 0.260         | -0.648**      | -0.146        | 0.586**                                 | 0.879**                 | -0.717**               | 1       |    |
| Remove efficiency                       | -0.509**      | -0.207       | 0.540**       | -0.562**      | -0.235        | 0.175                                   | 0.945**                 | -0.194                 | 0.718** | 1  |

\* and \*\* represent significant correlations at level  $p < 0.05$  and  $p < 0.01$ , respectively.

**Table S4** Pearson correlation coefficients among different metal elements, including Mn, B, Na, Mg, Al, P, K, Ca, Fe, Cu and Zn (n=3) in sunflower shoot.

|    | Mn<br>concentration | B       | Na     | Mg      | Al      | P       | K      | Ca      | Fe      | Cu      | Zn |
|----|---------------------|---------|--------|---------|---------|---------|--------|---------|---------|---------|----|
| Mn | 1                   |         |        |         |         |         |        |         |         |         |    |
| B  | 0.645**             | 1       |        |         |         |         |        |         |         |         |    |
| Na | 0.202               | 0.034   | 1      |         |         |         |        |         |         |         |    |
| Mg | 0.379*              | 0.491** | 0.199  | 1       |         |         |        |         |         |         |    |
| Al | 0.656**             | 0.777** | 0.217  | 0.155   | 1       |         |        |         |         |         |    |
| P  | 0.823**             | 0.701** | 0.248  | 0.588** | 0.584** | 1       |        |         |         |         |    |
| K  | -0.042              | -0.014  | -0.059 | 0.420*  | -0.156  | 0.246   | 1      |         |         |         |    |
| Ca | 0.545**             | 0.611** | 0.206  | 0.794** | 0.441*  | 0.609** | 0.041  | 1       |         |         |    |
| Fe | 0.734**             | 0.815** | 0.211  | 0.316   | 0.947** | 0.720** | -0.010 | 0.522** | 1       |         |    |
| Cu | 0.764**             | 0.895** | 0.175  | 0.477** | 0.810** | 0.845** | 0.056  | 0.643** | 0.900** | 1       |    |
| Zn | 0.872**             | 0.720** | 0.322  | 0.314   | 0.793** | 0.797** | -0.130 | 0.514** | 0.850** | 0.813** | 1  |

\* and \*\* represent significant correlations at level  $p < 0.05$  and  $p < 0.01$ , respectively.

**Table S5** Pearson correlation coefficients among different metal elements, including Mn, B, Na, Mg, Al, P, K, Ca, Fe, Cu and Zn (n=3) in sunflower root.

|    | Mn<br>concentration | B       | Na      | Mg      | Al      | P       | K      | Ca      | Fe    | Cu    | Zn |
|----|---------------------|---------|---------|---------|---------|---------|--------|---------|-------|-------|----|
| Mn | 1                   |         |         |         |         |         |        |         |       |       |    |
| B  | 0.049               | 1       |         |         |         |         |        |         |       |       |    |
| Na | 0.358               | -0.045  | 1       |         |         |         |        |         |       |       |    |
| Mg | 0.468**             | 0.058   | 0.568** | 1       |         |         |        |         |       |       |    |
| Al | 0.192               | 0.144   | 0.008   | 0.398*  | 1       |         |        |         |       |       |    |
| P  | 0.017               | 0.365*  | 0.258   | 0.010   | 0.099   | 1       |        |         |       |       |    |
| K  | -0.045              | 0.284   | -0.394* | -0.383* | 0.037   | 0.540** | 1      |         |       |       |    |
| Ca | 0.268               | 0.504** | -0.063  | 0.361   | 0.299   | 0.262   | 0.418* | 1       |       |       |    |
| Fe | 0.161               | 0.178   | -0.202  | 0.262   | 0.858** | 0.023   | 0.091  | 0.281   | 1     |       |    |
| Cu | 0.485**             | 0.155   | 0.277   | 0.523** | 0.288   | 0.244   | 0.215  | 0.493** | 0.266 | 1     |    |
| Zn | -0.108              | 0.246   | -0.132  | 0.042   | -0.046  | -0.082  | 0.090  | 0.211   | 0.160 | 0.248 | 1  |

\* and \*\* represent significant correlations at level  $p < 0.05$  and  $p < 0.01$ , respectively.
